# Supplementary material for: Oil-in-oil droplet stability dependence on dimensions of 2D Pickering particles of controlled size
Source: Royal Society of Chemistry journal article supplement (doi:10.1039/d4lp00091a), 2024-01-01
Supplement: d4lp00091a1.pdf [file d4lp00091a1.pdf]

## 1 Supporting Information

### 2 **Living crystallisation-driven self-assembly of polyester-based 1D and 2D** 3 **particles of controlled size as oil-in-oil Pickering particles**

4 Simon D. Dale,<sup>a</sup> James Beament,<sup>b</sup> Elizabeth Mould,<sup>b</sup> Andrew P. Dove,<sup>\*a</sup> and Rachel K. O'Reilly<sup>\*a</sup>

5 <sup>a</sup>School of Chemistry, University of Birmingham, Edgbaston, Birmingham B15 2TT, UK. <sup>b</sup>Infineum UK Ltd, Milton Hill, Abingdon OX13 6BB, UK

6 <sup>\*</sup>Corresponding authors: a.dove@bham.ac.uk, r.oreilly@bham.ac.uk

## 7 **Experimental section**

### 8 **Materials and instruments**

9 Chemicals were purchased from Sigma-Aldrich. The  $\epsilon$ -caprolactone monomer was dried over  
10 CaH<sub>2</sub> for 24 h. The monomer was purified by distillation under reduced pressure before storing  
11 under an inert atmosphere of N<sub>2</sub>.

12

### 13 *Nuclear magnetic resonance spectroscopy*

14 <sup>1</sup>H NMR and <sup>13</sup>C NMR spectra were recorded on a Bruker DPX-300, DPX-400 or HD500 spectrometer.

15

### 16 *Glove box*

17 Air-free work was conducted in the nitrogen atmosphere of a Mbraun MB Unilab Pro SP or Mbraun  
18 MB-01 equipped with a solvent filter.

19

### 20 *Size exclusion chromatography (SEC)*

21 SEC measurements were performed in CHCl<sub>3</sub> on an Agilent 1260 Infinity II multi-detector GPC/SEC  
22 system fitted with RI, ultraviolet (UV,  $\lambda$  = 309 nm), and viscometer detectors. The polymer was eluted  
23 through an Agilent guard column (PLGel 5  $\mu$ M, 50  $\times$  7.5 mm) and two Agilent mixed-C columns (PLGel  
24 5  $\mu$ M, 300  $\times$  7.5 mm) using CHCl<sub>3</sub> (buffered with 0.5% NEt<sub>3</sub>) as the mobile phase (flow rate = 1 mL min<sup>-1</sup>,  
25 40 °C). Number average molecular weights ( $M_n$ ), weight average molecular weights ( $M_w$ ) and  
26 dispersities ( $D_M = M_w/M_n$ ) were determined using Agilent GPC/SEC software (vA.02.01) against a 15-  
27 point calibration curve ( $M_p = 162 - 3,187,000$  g mol<sup>-1</sup>) based on poly(styrene) standards (Easivial PS-  
28 M/H, Agilent). Molecular weights ( $M_n$ ), weight average molecular weights ( $M_w$ ) are given in g mol<sup>-1</sup>.

29

### 30 *LogP<sub>oct</sub>/SA Analysis.*

31 Octanol-water partition coefficients (LogP<sub>oct</sub>) were calculated for oligomeric models in Materials  
32 Studio 2020, using an atom-based approach (ALogP98 method) for all molecular models containing C,  
33 H, N, and O atoms.<sup>1</sup> LogP<sub>oct</sub> calculations were normalized by solvent accessible surface area (SA) using  
34 Materials Studio 2020.<sup>1</sup> First, single oligomers were subjected to a Geometry Optimization procedure  
35 using the Forcite Molecular Dynamics (MD) module with a COMPASS II force field. The force field  
36 contains information on important parameters, like preferred bond lengths, bond angles, torsion  
37 angles, partial charges, and van der Waals radii that influence the conformation. To minimize energy  
38 and determine a preferred conformation, these simulations ran until the energy of the oligomer  
39 decreased below predetermined convergence criteria (1  $\times$  10<sup>-4</sup> kcal mol<sup>-1</sup> energy convergence, 0.005  
40 kcal mol<sup>-1</sup>/Å force convergence, and 5  $\times$  10<sup>-5</sup> Å displacement convergence). Second, these SA values

1 represent the Connolly surface area created by an algorithm that rolls a ball over the surface of the  
2 oligomer. To ensure the SA values are meaningful in the context of octanol-water partition coefficients  
3 ( $\text{LogP}_{\text{oct}}$ ), the probe had a 1.4 Å radius to match the size of a water molecule. Third, to monitor  
4 variations in surface area calculations as the n-mer size increased, oligomers were annealed for 200  
5 cycles using a sinusoidal temperature ramp (300 – 700 K) to maximize variability in SA values. After  
6 averaging SA values for cycles 100, 150 and 200, the standard deviation ranged from 0.4 - 2.7% with  
7 an average of 1.2%. Oligomeric models contained appropriate ratios of PCL and PnDMA units to mimic  
8 experimental conditions.

9

#### 10 *Differential scanning calorimetry (DSC)*

11 Determination of the DSC curves was carried out using a STARE system DSC3 with an auto-sampler  
12 (Mettler Toledo, Switzerland). Disc shapes measuring 5 mm in diameter and 0.4 - 0.6 mm in thickness  
13 weighing 5 - 10 mg of polymer. Sample discs were positioned in 40 µL aluminium pans. Thermograms  
14 obtained with a heating rate of 10 °C min<sup>-1</sup> were recorded from -100 - 100 °C with a 10 °C min<sup>-1</sup> heating  
15 and cooling rate over two cycles. The glass transition temperature ( $T_g$ ) was determined by the  
16 minimum of the first derivative in the second heating cycle of DSC.

17

#### 18 *Transmission electron microscopy (TEM)*

19 TEM imaging was performed on a JEOL JEM-1400 microscope operating at an acceleration voltage of  
20 80 kV. Samples were diluted with n-octane after 1 week of ageing (0.1 mg mL<sup>-1</sup>) prior to analysis.  
21 Samples were drop cast onto formvar-coated copper grids and dried overnight. TEM samples were  
22 positively stained by exposure to ruthenium (VIII) oxide vapour for 7 minutes at 20 °C prior to analysis.  
23 The ruthenium (VIII) oxide was prepared as follows: ruthenium (IV) oxide (0.30 g) was added to water  
24 (50 g) to form a black slurry. Sodium periodate (2.0 g) was added and stirred for 1 minute prior to use.<sup>2</sup>

25

#### 26 *Atomic force microscopy (AFM)*

27 AFM imaging was performed on a JPK Nanowizard 4 system at room temperature in the supplied  
28 acoustic enclosure and vibration isolation using Nanosensor PPP-NCHAuD tips with a force constant  
29 of around 42 N·m<sup>-1</sup>. For data acquisition and handling Nanowizard Control and Data Processing  
30 Software V.6.1.117 in QI mode with a setpoint of 25 nN was used. Samples were prepared on freshly  
31 cleaved mica by drop-casting a solution of 0.1 mg·mL<sup>-1</sup> sample in octane, allowing to dry, then washing  
32 with heptane and allowing to dry overnight.

#### 33 *Light microscope*

34 Emulsions were imaged using a Leica DMIL LED microscope equipped with a Leica MC170 HD colour  
35 camera. 7 µL of the sample was added on a glass slide and covered with a Menzel-Gläser 20 × 20 mm  
36 # 0 cover slip before imaging immediately. Magnification: 40 or 20 x.

#### 37 *Surface tension*

38 The surface tension between the solvents were measured using a KRÜSS DSA25S drop-shape  
39 analyser. The shape of pendant DMF or acetonitrile drops, immersed in octane or assembly solution,  
40 was recorded and analysed by the Laplace equation of capillarity to determine the DMF- or  
41 acetonitrile-octane interfacial tension.

## 1 Experimental procedures

2

### 3 *Synthesis of chain transfer agent (CTA)/ROP initiator: 2-cyano-5-hydroxypentan-2-yl ethyl* 4 *carbonotrithioate (CHPET)*

5 Synthesis of CHPET was conducted following a previously reported method.<sup>3</sup> <sup>1</sup>H NMR (400 MHz, CDCl<sub>3</sub>,  
6 299 K, ppm)  $\delta$  = 3.75 (t, J = 6.1 Hz, 2H), 3.36 (q, J = 7.4 Hz, 2H), 2.36 – 2.06 (m, 2H), 1.92 (s, 3H), 1.92 -  
7 1.83 (m, 2H), 1.38 (t, J = 7.4 Hz, 3H). <sup>13</sup>C NMR (101 MHz, CDCl<sub>3</sub>, 299 K, ppm)  $\delta$  = 217.4, 119.6, 61.8,  
8 47.0, 35.8, 31.3, 27.9, 24.9, 12.8.

9

### 10 *Synthesis of poly( $\epsilon$ -caprolactone)<sub>50</sub> (PCL<sub>50</sub>)*

11 In a nitrogen-filled glove box, diphenyl phosphate (0.035 g, 0.140 mmol) in dry toluene (3.5 mL) and  
12 CHPET (0.035 g, 0.140 mmol) in dry toluene (6.323 mL) were added to  $\epsilon$ -caprolactone (1.037 mL,  
13 9.823 mmol). The solution was stirred at room temperature for 6 h, and then precipitated into  
14 excess diethyl ether at 0 °C for three times and collected *via* Buckner filtration before drying under  
15 reduced vacuum over P<sub>2</sub>O<sub>5</sub> for 2 days (0.807 g). <sup>1</sup>H NMR (300 MHz, CDCl<sub>3</sub>, 299 K, ppm)  $\delta$  = 4.05 (t, J =  
16 6.7 Hz, 106H), 3.64 (t, J = 6.5 Hz, 2H), 3.33 (q, 2H), 2.30 (t, J = 7.5 Hz, 106H), 2.13 – 1.91 (m, 2H), 1.88  
17 (s, 3H), 1.73 – 1.56 (m, 218H), 1.46 – 1.30 (m, 110H). SEC (0.5% Net<sub>3</sub> in CHCl<sub>3</sub>,  $\lambda$  = 309 nm, PS  
18 standard)  $M_n$  = 10.5 kg mol<sup>-1</sup>,  $\bar{D}_M$  = 1.07.

19

### 20 *Synthesis of poly( $\epsilon$ -caprolactone)<sub>50</sub>-block-poly(*n*-decyl methacrylate)<sub>155</sub> (PCL<sub>50</sub>-*b*-PnDMA<sub>155</sub>)*

21 PCL<sub>50</sub> macro-CTA (0.05 g, 0.009 mmol), *n*-decyl methacrylate (filtered through basic alumina, 0.496 g,  
22 2.190 mmol), AIBN (14.40  $\mu$ L of a 10.00 mg mL<sup>-1</sup> solution) and toluene (filtered through basic  
23 alumina, 1.889 mL) were mixed in a pre-dried ampoule. The homogenous solution was degassed *via*  
24 three freeze-pump-thaw cycles and the ampoule back filled with nitrogen. The ampoule was  
25 clamped in a pre-heated oil bath at 70 °C for 18 h. The ampoule was removed from the oil bath and  
26 held in an ice bath for 10 minutes, whilst exposed to air, before the solution was precipitated into  
27 methanol (0 °C) three times. The product was collected and dried *in vacuo*. <sup>1</sup>H NMR (300 MHz, CDCl<sub>3</sub>,  
28 299 K, ppm)  $\delta$  = 4.06 (t, J = 6.7 Hz, 50H), 3.91 (s, 155H), 2.30 (t, J = 7.5 Hz, 50H), 1.84 (d, J = 29.8 Hz,  
29 137H), 1.71 – 1.52 (m, 292H), 1.28 (s, 1289H), 1.02 (s, 87H), 0.89 (t, J = 6.3 Hz, 406H). SEC (0.5% NET<sub>3</sub>  
30 in CHCl<sub>3</sub>,  $\lambda$  = 309 nm, PS standard)  $M_n$  = 38.9 kg mol<sup>-1</sup>,  $\bar{D}_M$  = 1.16.

31

### 32 *Crystallisation-driven self-assembly (CDSA) of PCL-based block copolymers*

33 Block copolymers and assembly solvent were added to a 7 mL vial at a concentration of 5 mg mL<sup>-1</sup>. The  
34 resultant solution was heated at 80 °C for a period of 8 h. After allowing the solution to cool overnight,  
35 the samples were aged for 2 weeks at ambient temperature prior to being analysed.

36

### 37 *Living-CDSA of PCL-based block copolymers*

38 Polydisperse cylindrical micelles of PCL<sub>50</sub>-*b*-PnDMA<sub>155</sub> in *n*-octane (0.5 mg mL<sup>-1</sup>) were sonicated (7  $\times$  30  
39 minute cycles) using a sonicating bath cooled to 0 °C. After seed formation, a volume of PCL<sub>50</sub>-*b*-  
40 PnDMA<sub>155</sub> and PCL<sub>50</sub> polymer solution in CHCl<sub>3</sub> (20 mg mL<sup>-1</sup> total, 10 mg mL<sup>-1</sup> wrt PCL<sub>50</sub>-*b*-PnDMA<sub>15</sub>) was  
41 added to a diluted sample of the seed solution (0.01 mg mL<sup>-1</sup> in *n*-octane) and aged for 2 days. The  
42 unimers-to-seed ratio was controlled by the volume of polymer solution that was added to the seed

1 solution. AFM images of the platelets were analysed by ImageJ software, where at least 100 particles  
2 were counted for each sample to obtain the platelet area.

3

#### 4 *Emulsion formation*

5 Platelet solution concentration was altered to achieve desired % w/w by removing solvent was a  
6 specified volume of assembly solution by air flow, then redispersing in a volume of octane to provide  
7 the targeted concentration. The solution was left to redisperse for an hour, then vortexed for 5  
8 seconds to ensure full redispersion. DMF was added directly to the particle solutions and vortexed for  
9 30 seconds before imaging. Emulsion images were analysed by ImageJ software, where at least 100  
10 droplet diameters were counted for each sample to obtain the average droplet diameter.

11

#### 12 *Short cylinder formation*

13 Polydisperse cylindrical micelles of PCL<sub>50</sub>-*b*-PnDMA<sub>155</sub> in *n*-octane (0.5 mg mL<sup>-1</sup>) were sonicated (3 × 30  
14 minute cycles) using a sonicating bath cooled to 0 °C.

15

1 **Supplementary Figures and Tables**

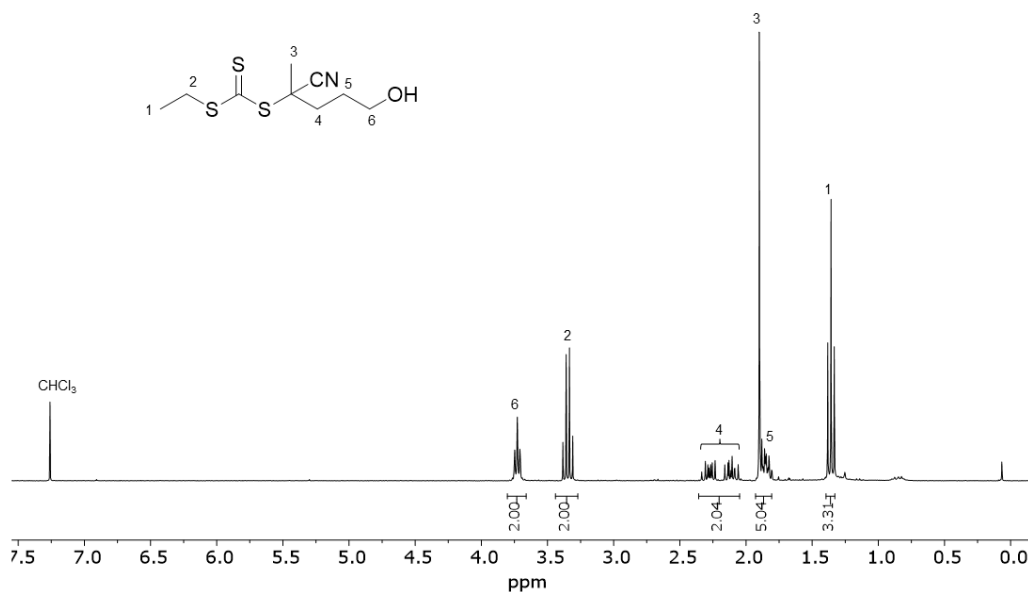

2 **Figure S1.** <sup>1</sup>H NMR spectrum (CDCl<sub>3</sub>, 300 MHz, 298 K) of 2-cyano-5-hydroxypentan-2-yl ethyl  
3 carbonotrithioate

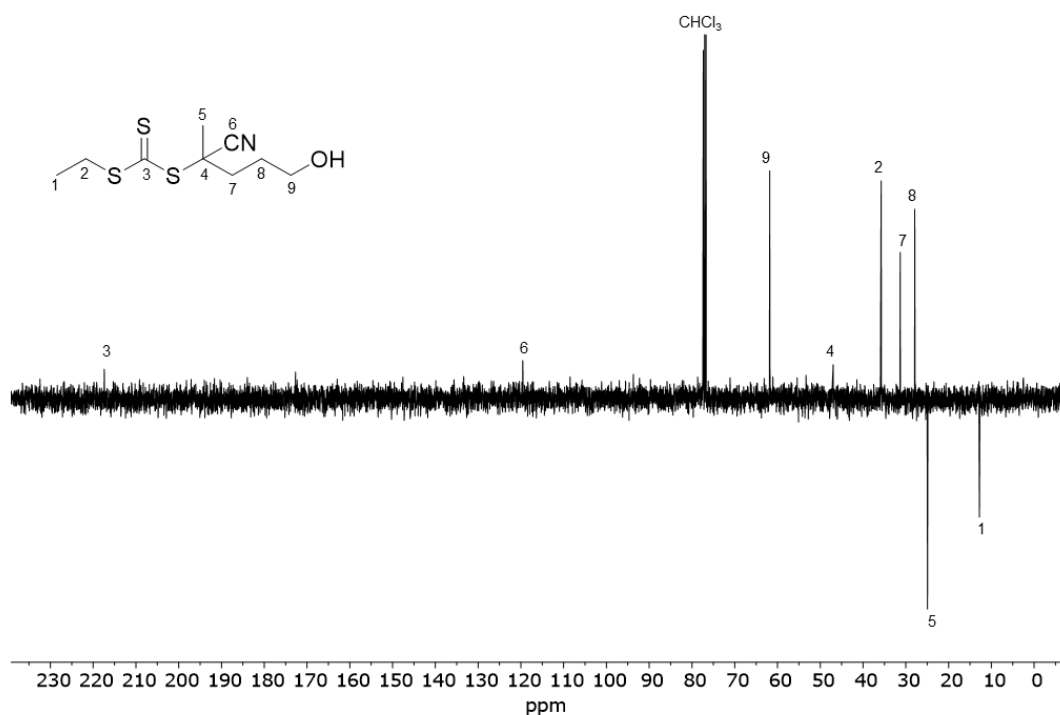

4 **Figure S2.** <sup>13</sup>C NMR spectrum (CDCl<sub>3</sub>, 300 MHz, 298 K) of 2-cyano-5-hydroxypentan-2-yl ethyl  
5 carbonotrithioate

6  
7  
8  
9  
10

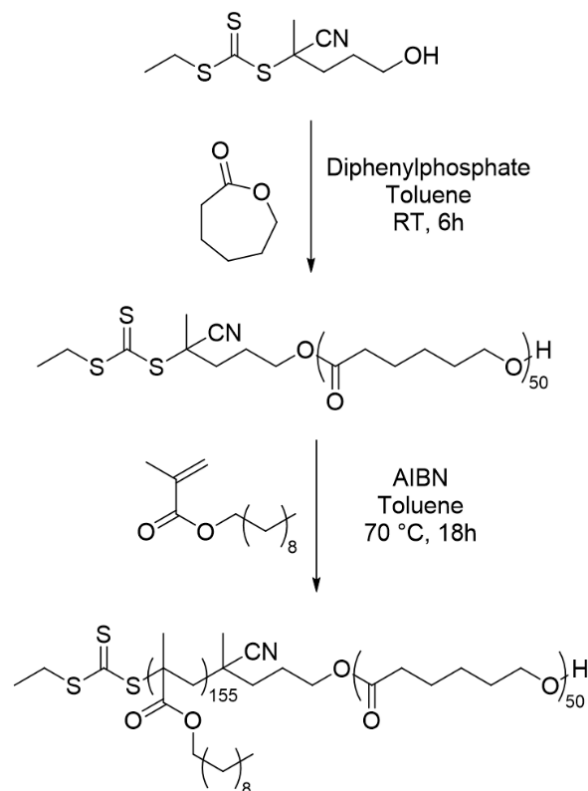

- 1
- 2 **Scheme 1.** Synthesis of PCL<sub>50</sub>-*b*-PnDMA<sub>155</sub> through the ring opening polymerisation of ε-caprolactone
- 3 and RAFT polymerisation of *n*-decyl methacrylate
- 4

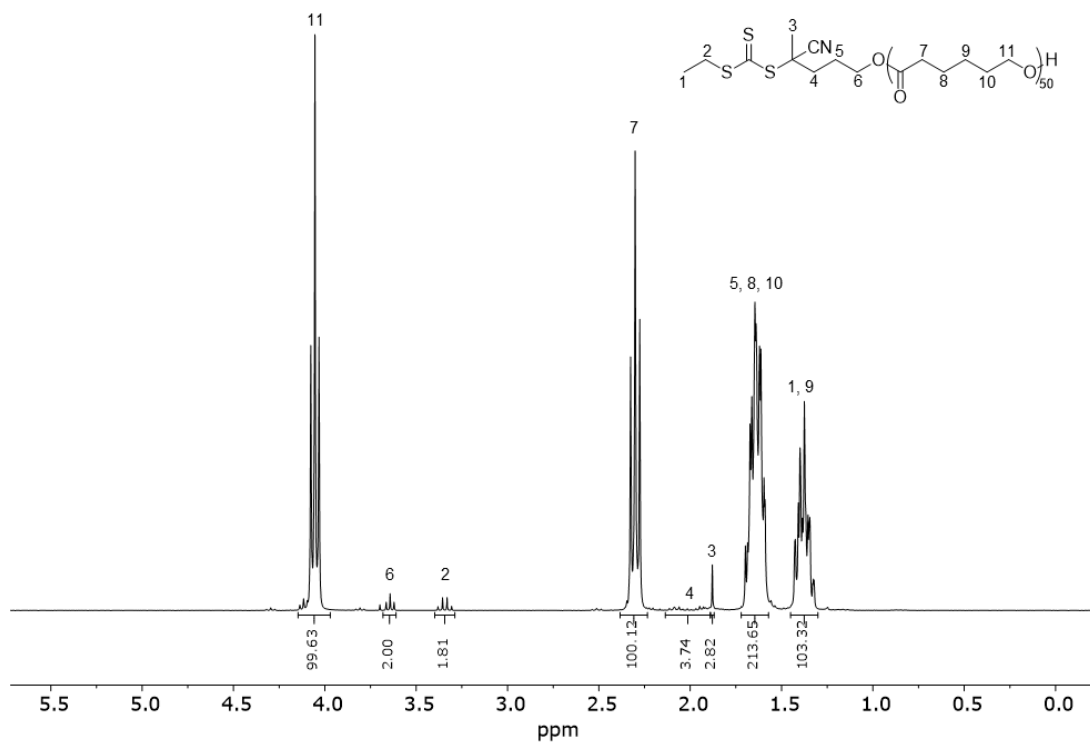

5 **Figure S3.** <sup>1</sup>H NMR spectrum (CDCl<sub>3</sub>, 300 MHz, 298 K) of PCL<sub>50</sub>

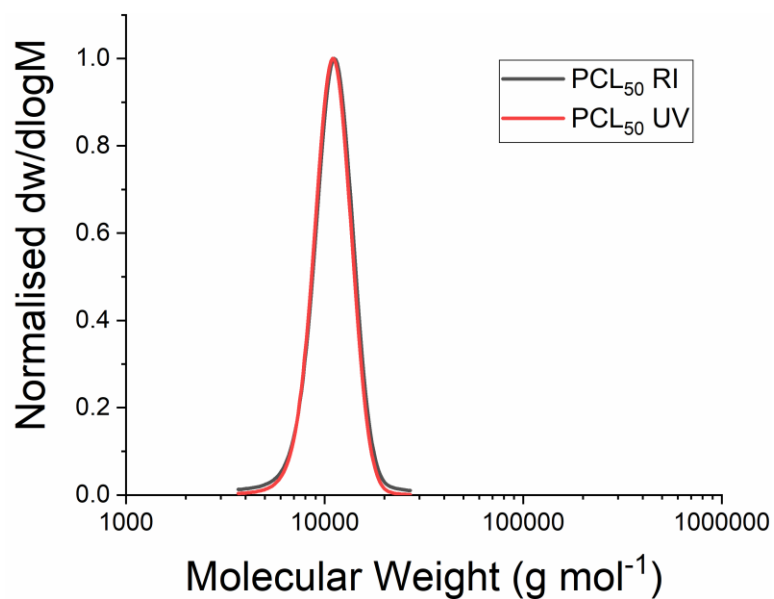

1  
2 **Figure S4.** Size exclusion chromatography analysis (RI and UV,  $\lambda = 309$  nm) of PCL<sub>50</sub> in CHCl<sub>3</sub> calibrated  
3 against PS standards.  
4  
5  
6  
7  
8  
9

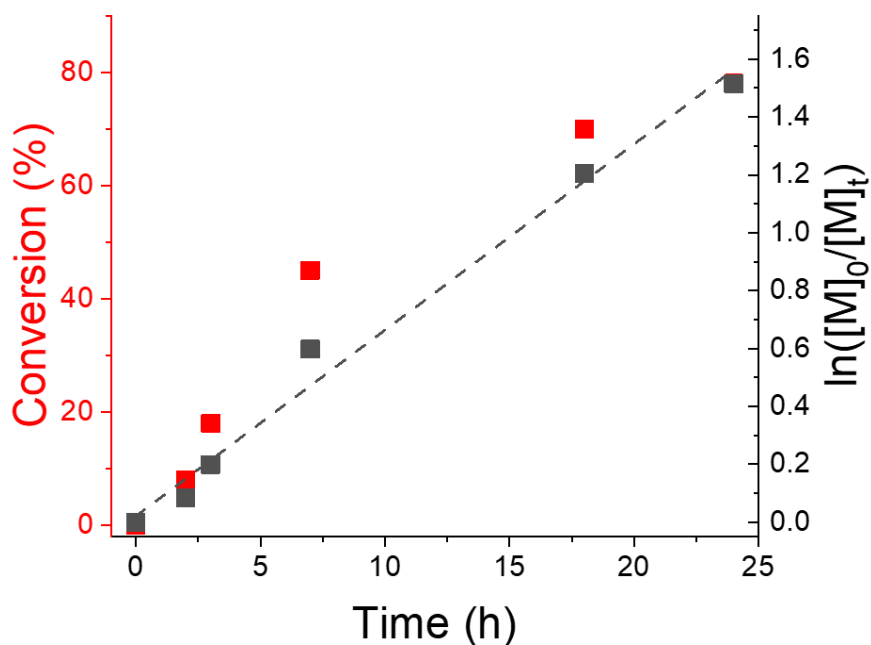

10 **Figure S5.** Conversion and ln of initial monomer concentration by monomer concentration  
11 (ln([M]<sub>0</sub>/[M]<sub>t</sub>)) against time for the RAFT polymerisation of nDMA.  
12  
13  
14  
15

1

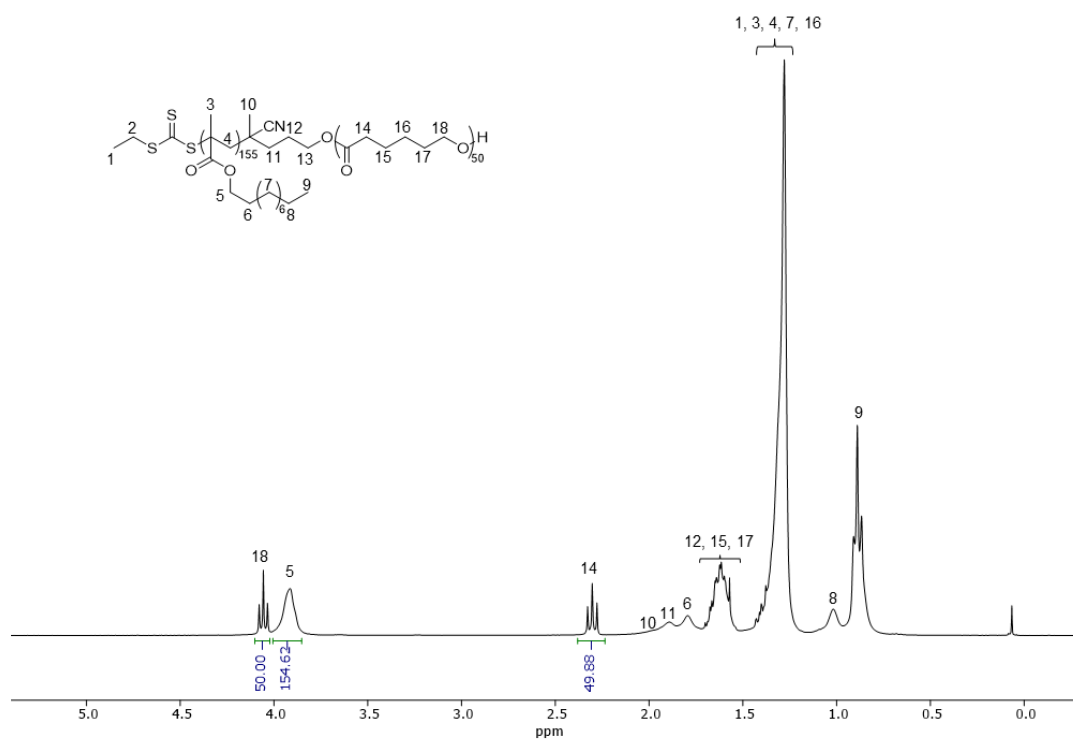2 **Figure S6.**  $^1\text{H}$  NMR spectrum ( $\text{CDCl}_3$ , 300 MHz, 298 K) of  $\text{PCL}_{50}\text{-}b\text{-PnDMA}_{155}$ 

3

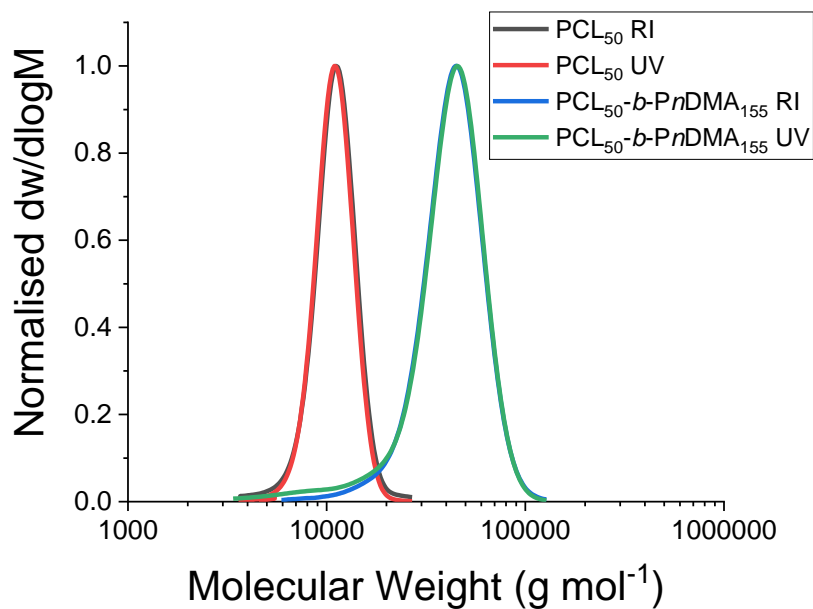4 **Figure S7.** Size exclusion chromatography analysis (RI and UV,  $\lambda = 309$  nm) of  $\text{PCL}_{50}$  and  $\text{PCL}_{50}\text{-}b\text{-PnDMA}_{155}$  in  $\text{CHCl}_3$  calibrated against PS standards.  
5

6

7

8

9

10



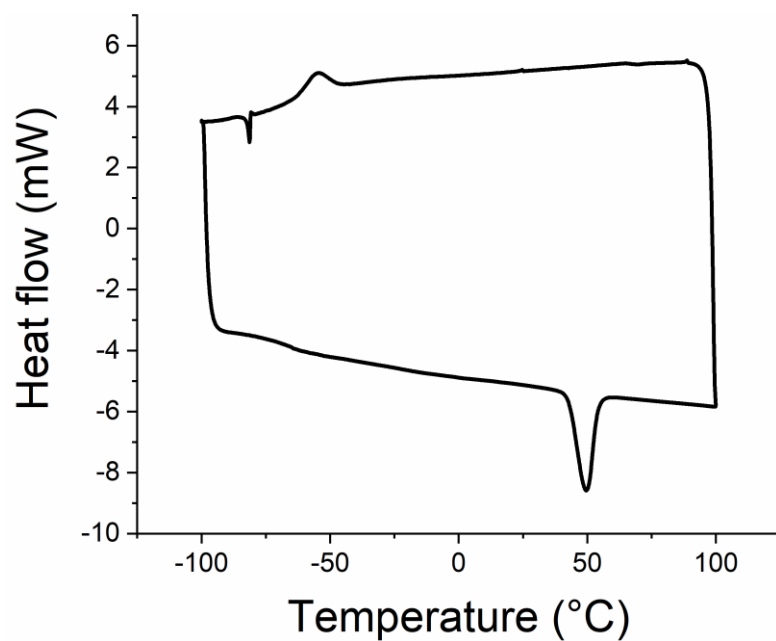

1  
2  
3  
4  
5  
6  
7

**Figure S8.** Differential scanning calorimetry analysis of PCL<sub>50</sub>-*b*-PnDMA<sub>155</sub>, heating rate 10 °C s<sup>-1</sup>

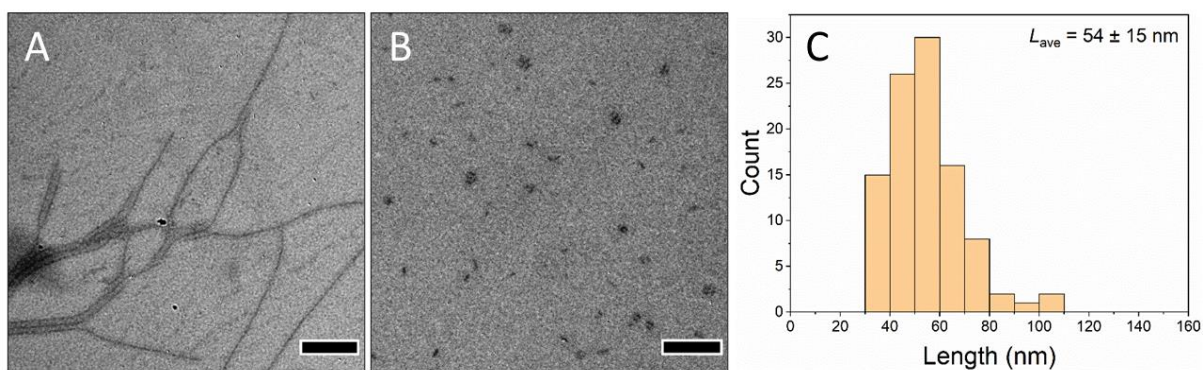

8 **Figure S9.** Transmission electron microscope (TEM) images of (A) cylindrical particles of PCL<sub>50</sub>-*b*-  
9 PnDMA<sub>155</sub> in octane, and (B) seed particles from the sonication of cylinders. (C) distribution of seed  
10 particle lengths.

11  
12  
13  
14  
15  
16  
17  
18  
19  
20

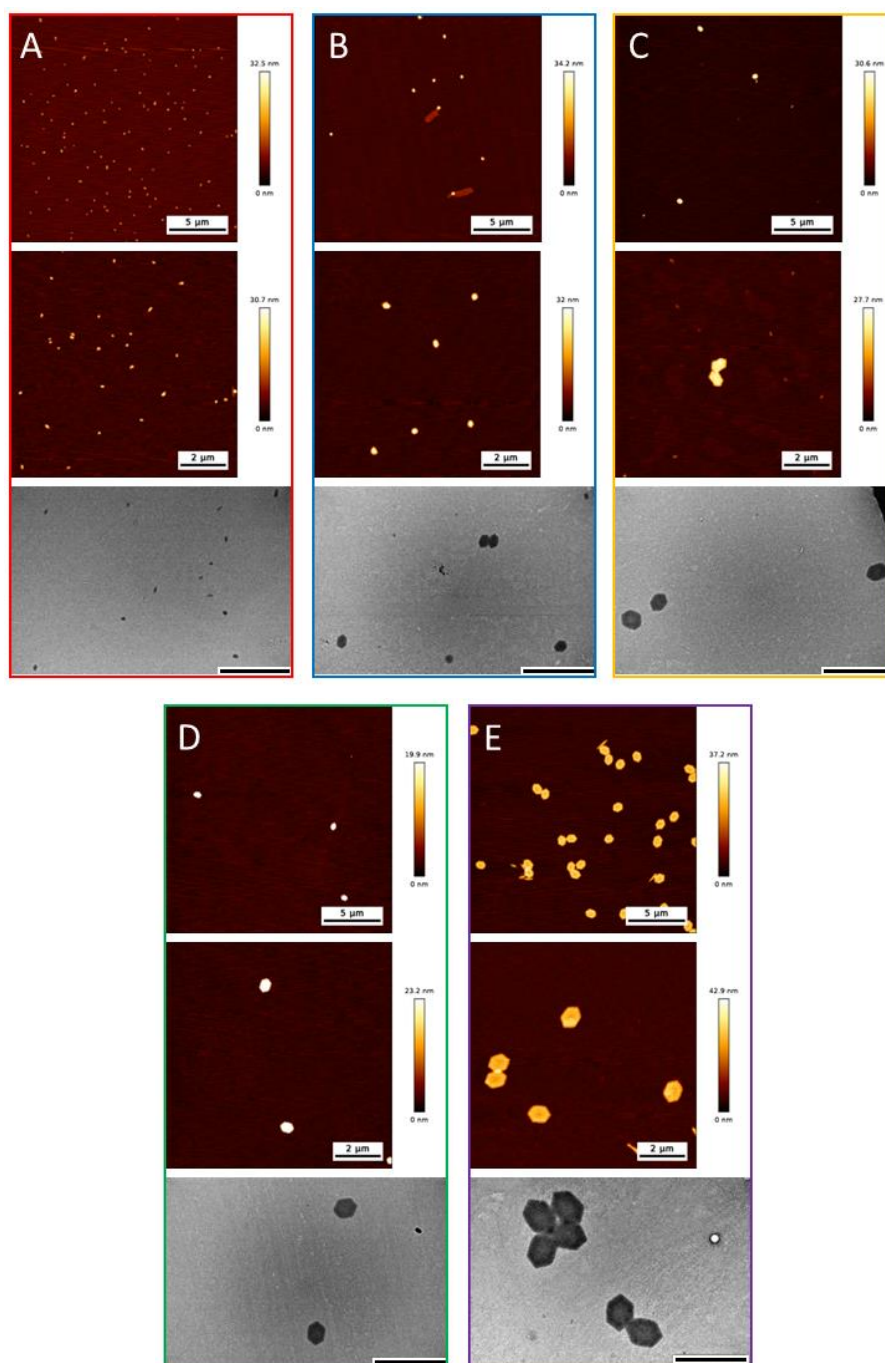

1 **Figure S10.** AFM and TEM images of 2D platelets from addition of PCL<sub>50</sub> and PCL<sub>50</sub>-*b*-PnDMA<sub>155</sub> to seed  
 2 particles at  $m_{\text{unimer}}/m_{\text{seed}}$  ratios (A) 1, (B) 10, (C) 25, (D) 40, and (E) 100. All scale bars in TEM images =  
 3 2  $\mu\text{m}$

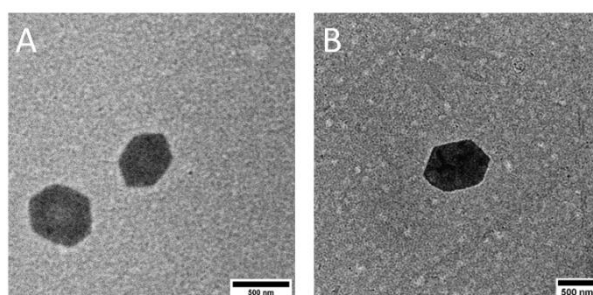

4 **Figure S11.** TEM images of platelets with  $m_{\text{unimer}}/m_{\text{seed}}$  ratio = 25 (A) at assembly concentration, (B)  
 5 after redispersion at 1% w/w in octane

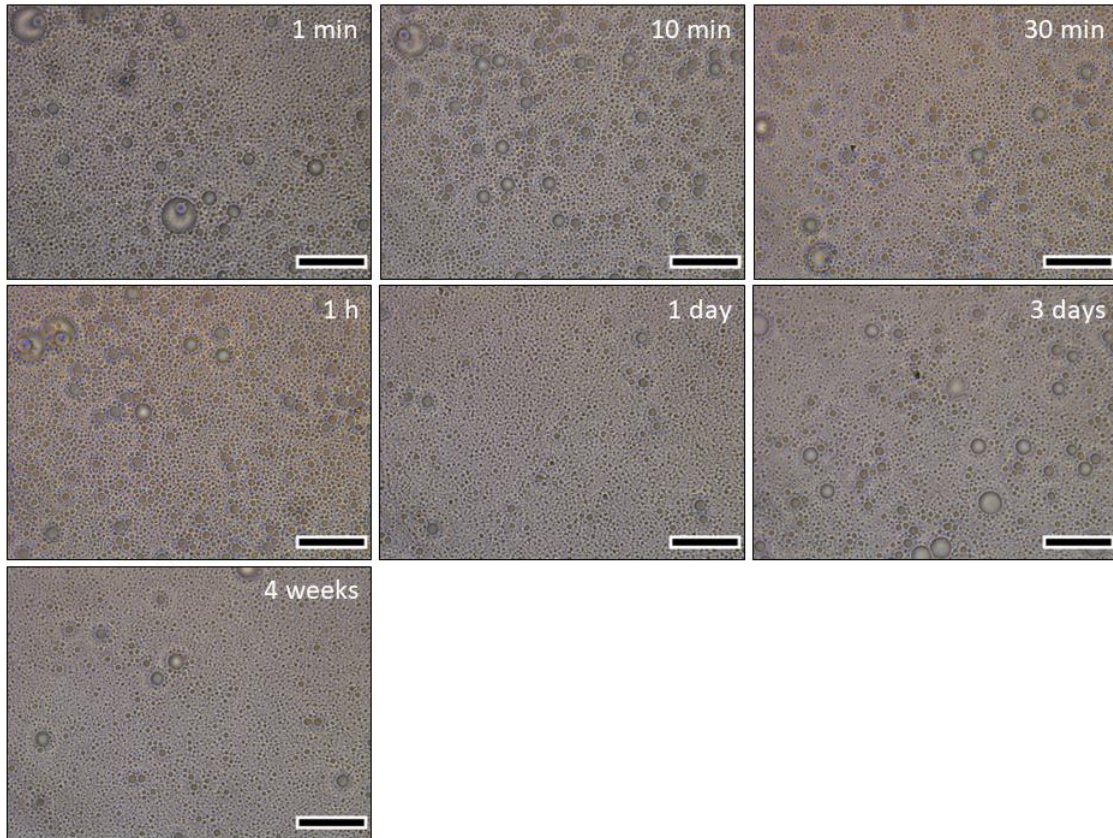

1 **Figure S12.** Microscope images between 1 minute and 4 weeks of emulsion of DMF/octane 1/5 using  
 2 P25 as emulsifier at 1% w/w platelet concentration. All scale bars = 50 μm

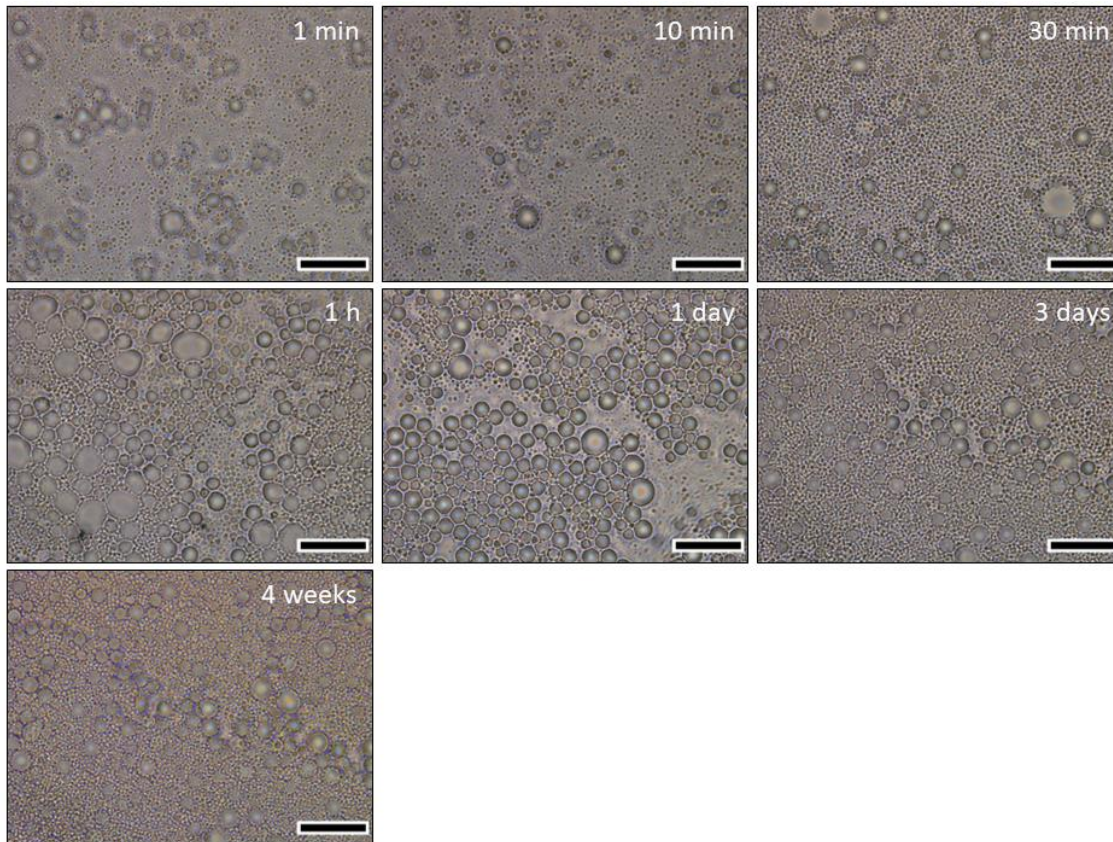

3 **Figure S13.** Microscope images between 1 minute and 4 weeks of emulsion of DMF/octane 1/5 using  
 4 P100 as emulsifier at 1% w/w platelet concentration. All scale bars = 50 μm

1  
2  
3

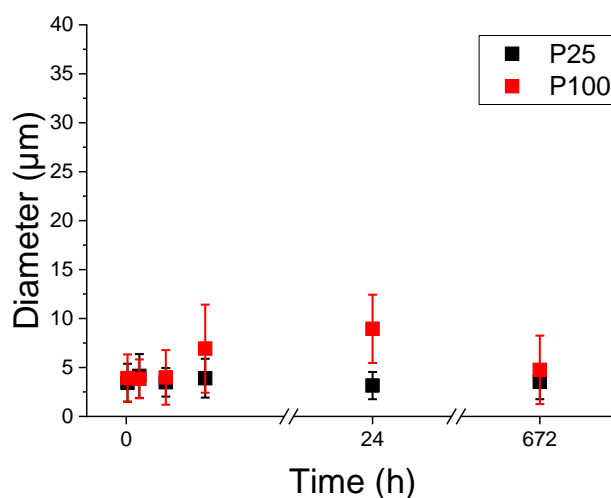

4  
5  
6  
7  
8  
9  
10  
11  
12  
13  
14  
15  
16  
17  
18

**Figure S14.** Droplet sizes of DMF/octane 1/5 v/v stabilised by P25 and P100 at 1% w/w particle concentration over time.

**Table S1.** Droplet diameters of emulsions stabilised by P25 and P100 at 1% w/w over time. 100 droplets counted for each measurement.

| Time    | Diameter (µm) |           |
|---------|---------------|-----------|
|         | P25           | P100      |
| 1 min   | 3.4 ± 1.9     | 3.9 ± 2.4 |
| 10 mins | 4.1 ± 2.2     | 3.8 ± 2.0 |
| 30 mins | 3.5 ± 1.5     | 4.0 ± 2.8 |
| 1 h     | 3.9 ± 2.0     | 6.9 ± 4.5 |
| 24 h    | 3.2 ± 1.4     | 8.9 ± 3.5 |
| 72 h    | 3.8 ± 2.4     | 5.2 ± 2.9 |
| 4 weeks | 3.5 ± 1.8     | 4.8 ± 3.5 |

19  
20

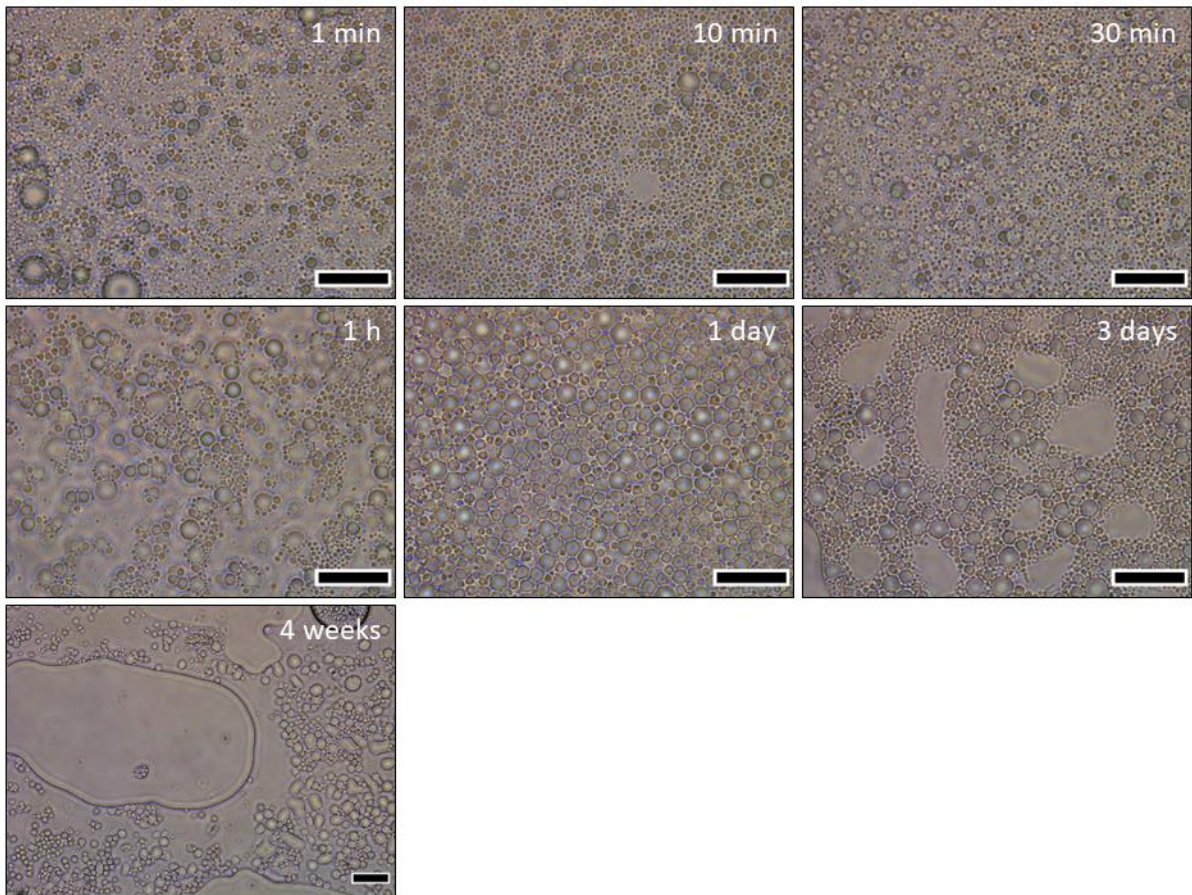

1 **Figure S15.** Microscope images between 1 minute and 4 weeks of emulsion of DMF/octane 1/5 using  
2 P25 as emulsifier at 0.2% w/w platelet concentration. Scale bars = 50  $\mu\text{m}$

1

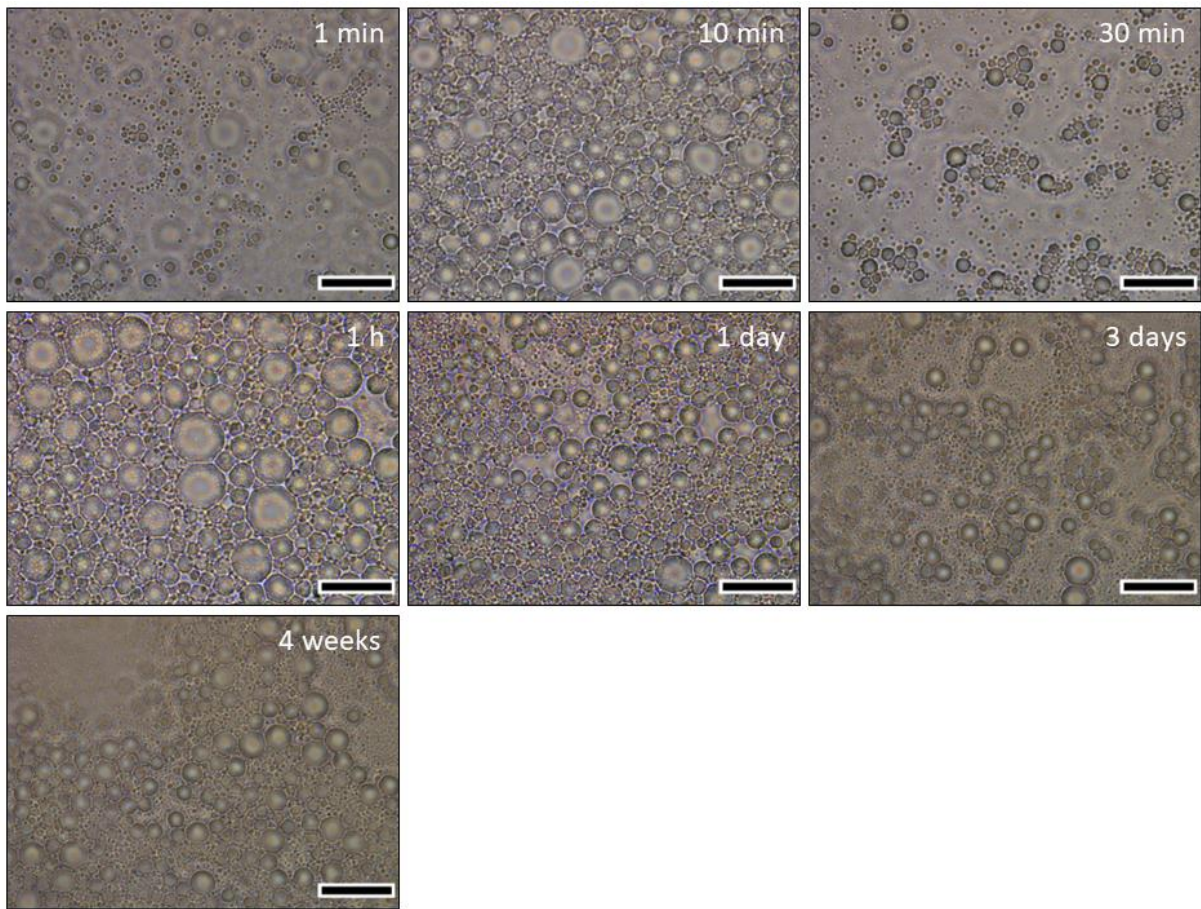

2 **Figure S16.** Microscope images between 1 minute and 4 weeks of emulsion of DMF/octane 1/5 using  
3 P100 as emulsifier at 0.2% w/w platelet concentration. Scale bars = 50  $\mu\text{m}$

4

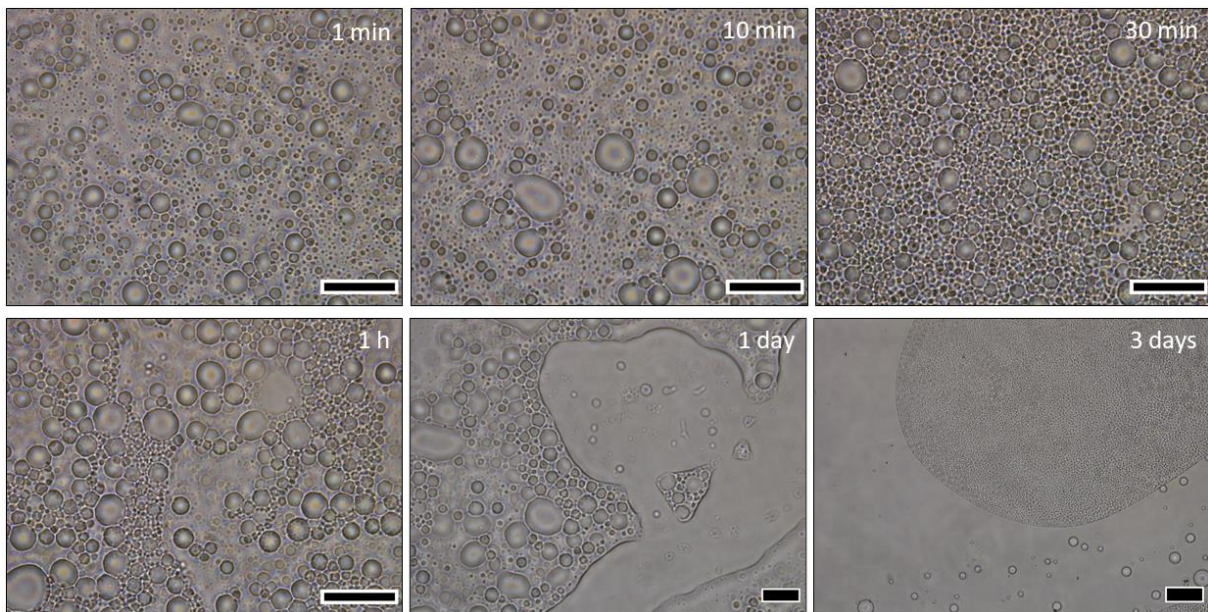

5 **Figure S17.** Microscope images between 1 minute and 3 days of emulsion of DMF/octane 1/5 using  
6 P100 as emulsifier at 0.1% w/w platelet concentration. Scale bars = 50  $\mu\text{m}$

7

8

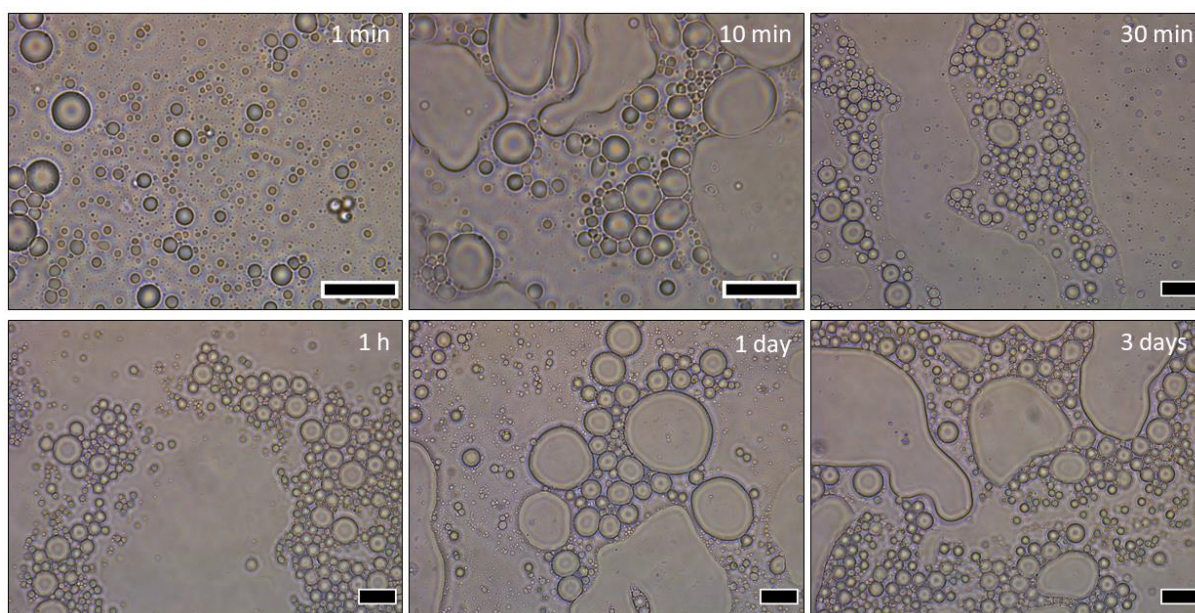

1  
2 **Figure S18.** Microscope images between 1 minute and 3 days of emulsion of DMF/octane 1/5 using  
3 P25 as emulsifier at 0.1% w/w platelet concentration. Scale bars = 50  $\mu\text{m}$

4  
5  
6 **Table S2.** Droplet diameters of emulsions stabilised by P25 and P100 at 0.2 and 0.1% w/w over time.  
7 100 droplets counted for each measurement.  
8

| Time    | Diameter ( $\mu\text{m}$ ) |                 |                |                 |
|---------|----------------------------|-----------------|----------------|-----------------|
|         | P25                        |                 | P100           |                 |
|         | 0.2% w/w                   | 0.1% w/w        | 0.2% w/w       | 0.1% w/w        |
| 1 min   | $3.7 \pm 3.6$              | $6.0 \pm 5.2$   | $4.5 \pm 2.5$  | $5.3 \pm 3.6$   |
| 10 mins | $4.1 \pm 2.5$              | $11.2 \pm 12.6$ | $9.9 \pm 5.5$  | $6.6 \pm 5.7$   |
| 30 mins | $3.7 \pm 1.8$              | -               | $6.0 \pm 3.2$  | $6.3 \pm 3.3$   |
| 1 h     | $6.2 \pm 3.4$              | -               | $13.4 \pm 7.1$ | $9.3 \pm 3.8$   |
| 24 h    | $9.1 \pm 3.4$              | -               | $8.2 \pm 4.1$  | $16.8 \pm 19.1$ |
| 72 h    | $11.0 \pm 11.2$            | -               | $6.6 \pm 4.3$  | -               |
| 4 weeks | -                          | -               | $8.5 \pm 5.3$  | -               |

9

1

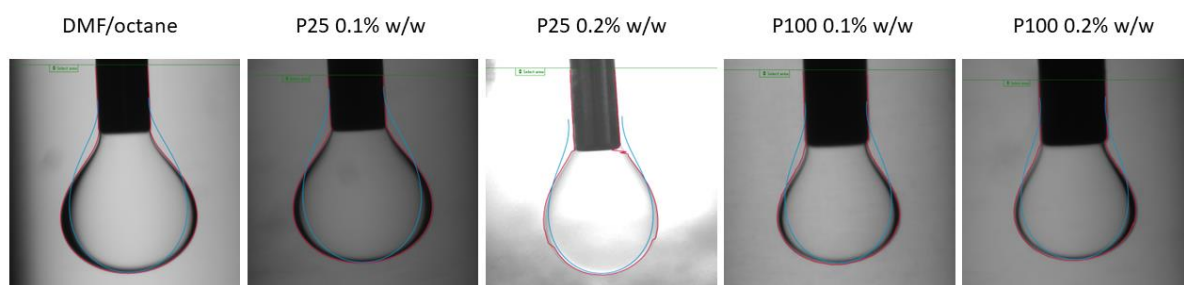

2

3 **Figure S19.** Drop shape analysis of a droplet of DMF in octane, and into self-assembly solutions of P25  
4 and P100 at 0.1 and 0.2% w/w in octane

5

6

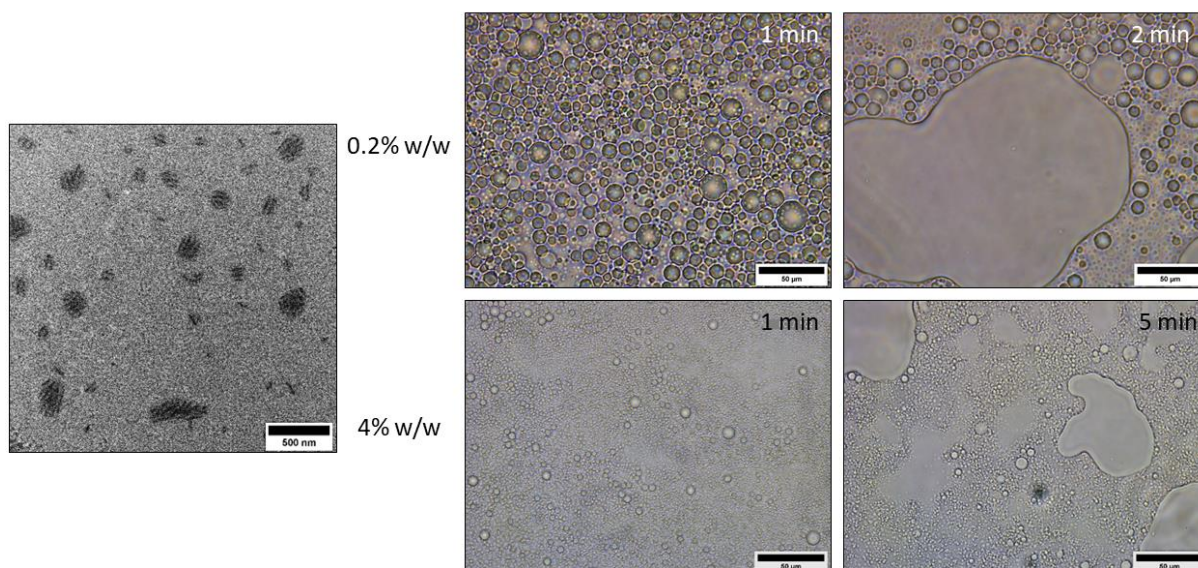

7

8 **Figure S20.** TEM image of short cylindrical micelles of PCL<sub>50</sub>-*b*-PnDMA<sub>155</sub> in octane. Microscope images  
9 of DMF/octane 1/5 v/v using short cylinders as emulsifier at 0.2% w/w and 4% w/w particle  
10 concentration. TEM scale bar = 500 nm. Emulsion images scale bars = 50 μm

11

12

13

14

15

16

17

18

19



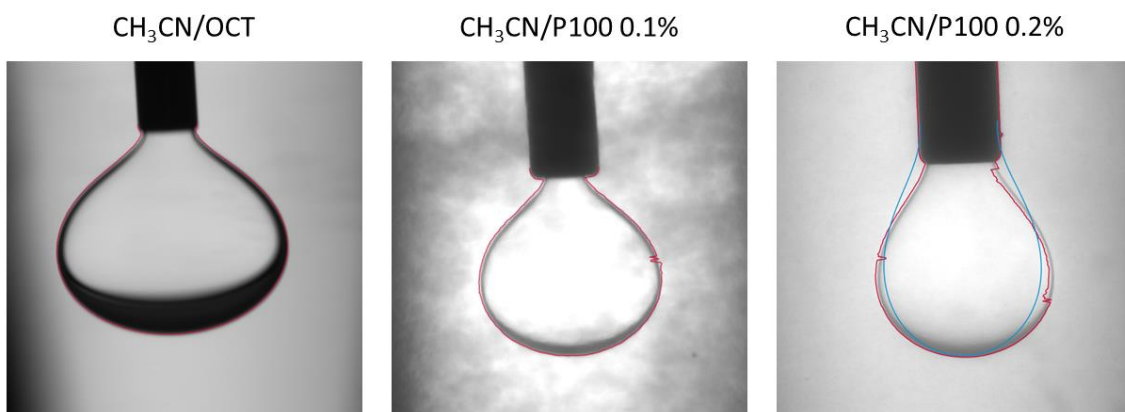

1  
 2 **Figure S21.** Drop shape analysis of a droplet of CH<sub>3</sub>CN in octane (left), into 0.1% w/w P100 in octane  
 3 (centre), and 0.2% w/w P100 in octane (right).  
 4

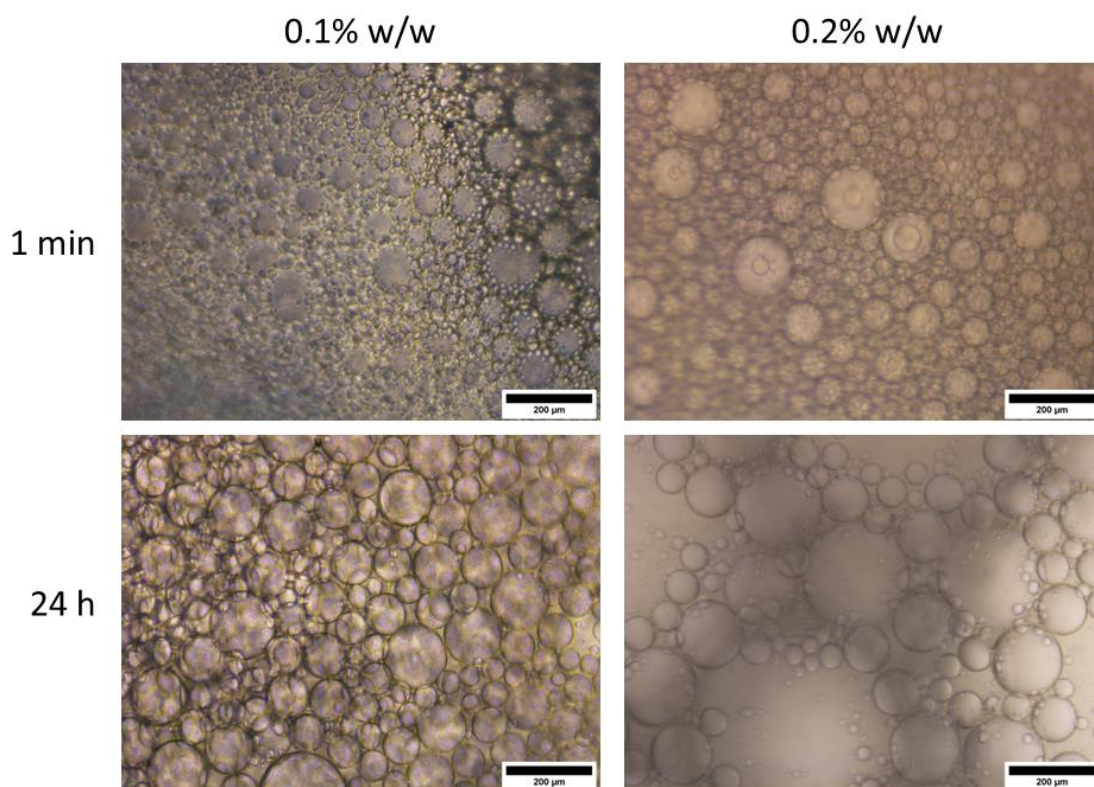

5  
 6 **Figure S22.** Microscope images between ACN/octane 1/5 v/v using P100 as an emulsifier at 0.1% w/w  
 7 and 0.2% w/w particle concentration after 1 min and 24 h post vortex. Emulsion images scale bars =  
 8 200 μm  
 9  
 10  
 11  
 12  
 13  
 14

1 **References**

2

- 3 1. I. Akar, J. C. Foster, X. Leng, A. K. Pearce, R. T. Mathers and R. K. O'Reilly, *ACS Macro Lett.*, 2022, **11**,  
4 498-503.
- 5 2. L. A. Fielding, M. J. Derry, V. Admiral, J. Rosselgong, A. M. Rodrigues, L. P. D. Ratcliffe, S. Sugihara and  
6 S. P. Armes, *Chem. Sci.*, 2013, **4**, 2081-2087.
- 7 3. M. C. Arno, M. Inam, Z. Coe, G. Cambridge, L. J. Macdougall, R. Keogh, A. P. Dove and R. K. O'Reilly, *J.*  
8 *Am. Chem. Soc.*, 2017, **139**, 16980-16985.

9
